# Supplementary material
Source: PubMed Central journal article supplement (PMC3733333)
Supplement: NIHMS416831-supplement-suuplement-fig_1.pdf [file NIHMS416831-supplement-suuplement-fig_1.pdf]

## Supplementary Figure 1

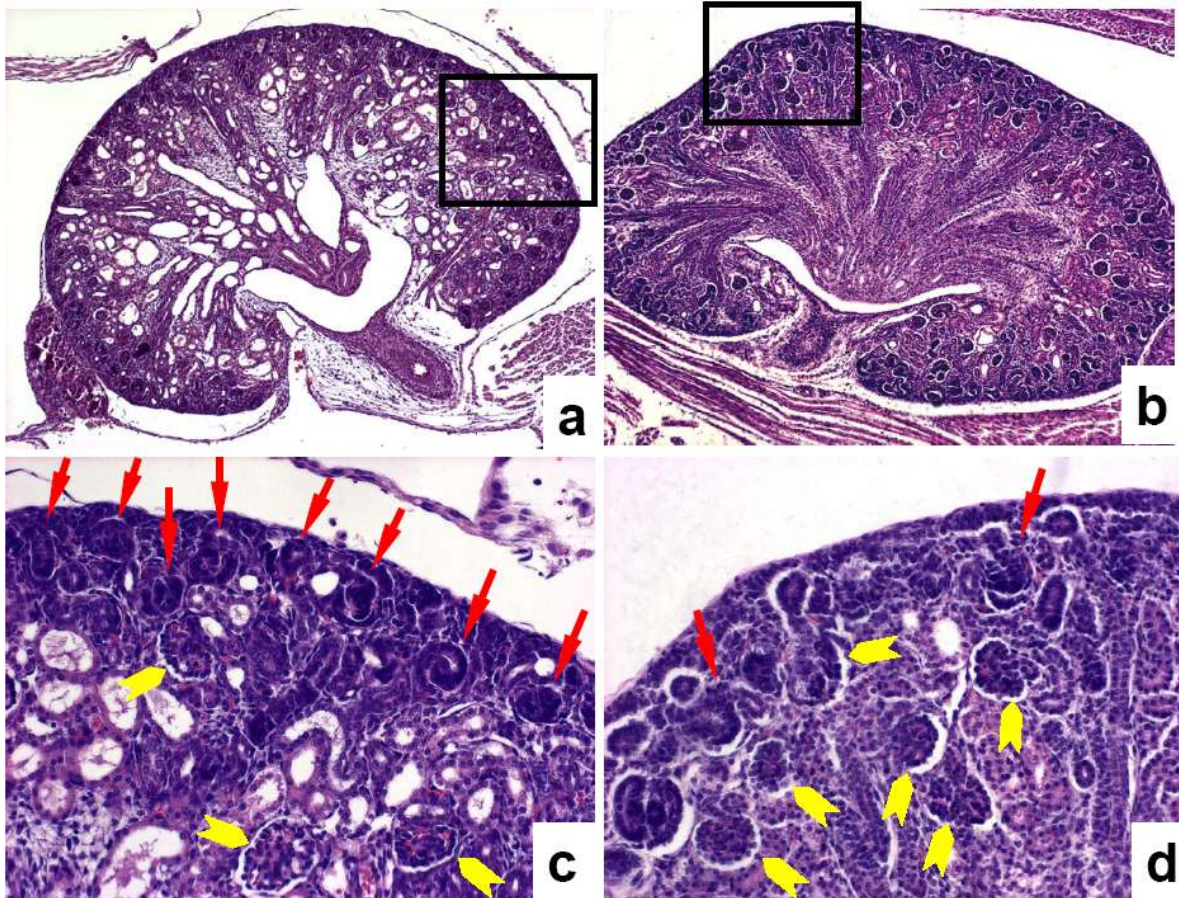

**Supplementary Figure 1:** Delayed nephron maturation and tubule differentiation in the (*inv/inv*) mouse. Histology of *inv/inv* mouse embryonic kidneys. E17.5 mouse embryonic kidneys were fixed in formalin, paraffin-embedded, sectioned at 8  $\mu$ m intervals and stained with hematoxylin/eosin. In contrast to heterozygous mutant kidneys (**b**), *inv/inv* kidneys showed cortico-medullary disorganization, failure of mature glomeruli to migrate to the cortex and low tubular density (**a**). Insets of (**a**) and (**b**) are shown at higher magnification in (**c**) and (**d**). Delayed nephrogenesis resulted in higher density of S- and comma-shaped bodies (red arrows), and fewer mature glomeruli (yellow arrowheads) in the cortex of *inv/inv* kidneys (**c**) compared to heterozygous controls (**d**).
