# Supplementary material
Source: PubMed Central journal article supplement (PMC3733333)
Supplement: NIHMS416831-supplement-suuplement-fig_2.pdf [file NIHMS416831-supplement-suuplement-fig_2.pdf]

## Supplementary Figure 2

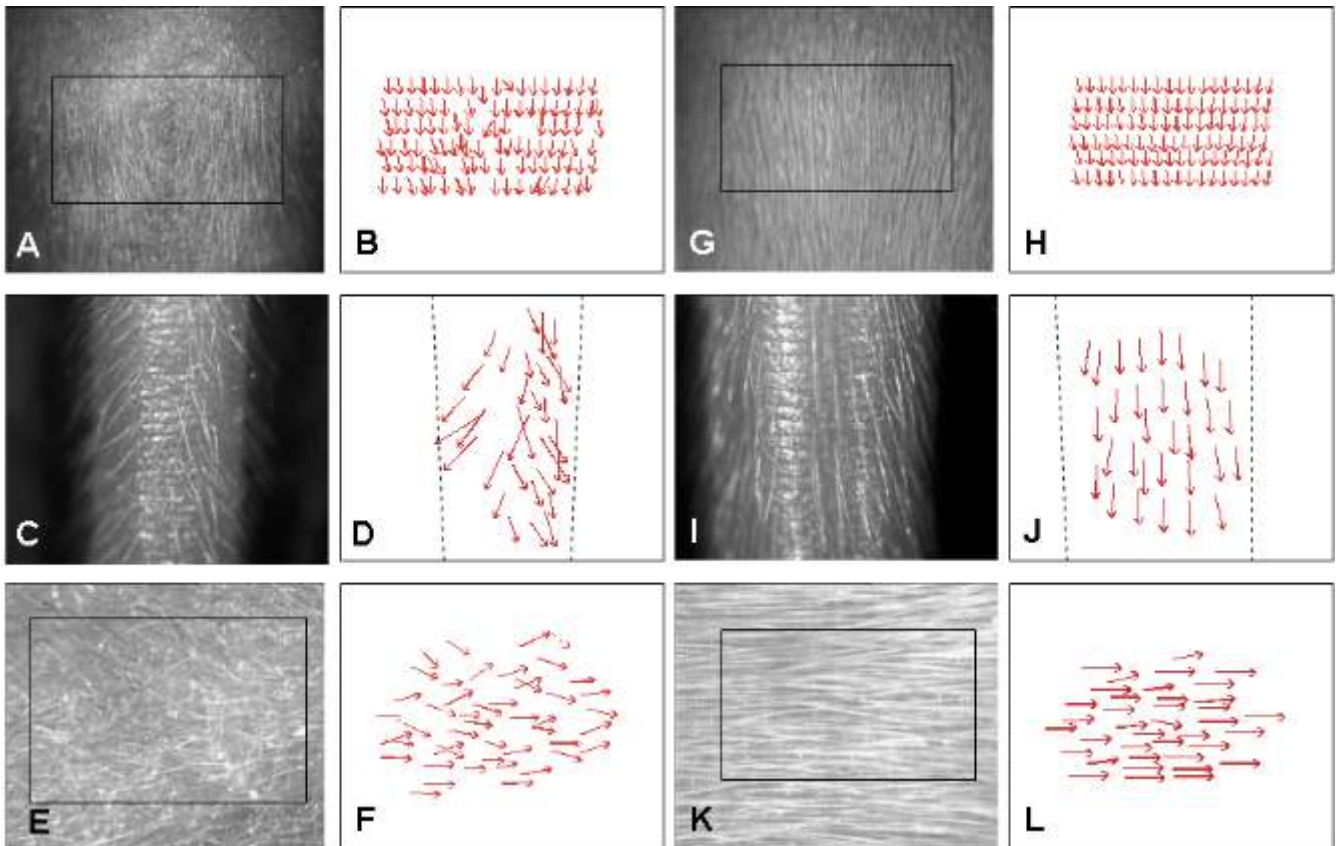

**Supplementary Figure 2:** Hair changes in *inv/inv* mice. Loss of inversin results in altered hair alignment reminiscent of the patterning defects observed in *Frizzled6*-deficient mice. Hair pattern in the head (**a,g**), tail (**c,i**) and mid back (**e,k**) in a homozygous *inv* mutant (**a-f**) compared to a heterozygous littermate (**g-l**). Diagrams (**b,d,f,h,j,l**) illustrate hair orientation corresponding to the box region on the top of the head (**a,g**), tail (**c,i**) and mid back (**e,k**). Red arrows indicate the growth direction of selected individual hair strands. Blue arrows indicate rostro-caudal orientation in the corresponding photograph.
