# Supplementary material
Source: PubMed Central journal article supplement (PMC3733333)
Supplement: NIHMS416831-supplement-suuplement-fig_4.pdf [file NIHMS416831-supplement-suuplement-fig_4.pdf]

# Supplementary Figure 4

**A**

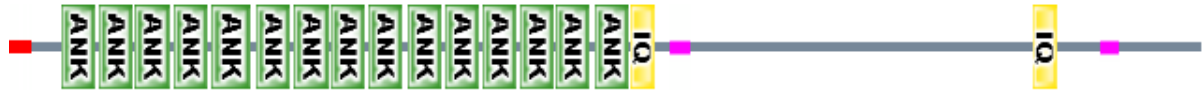

**B**

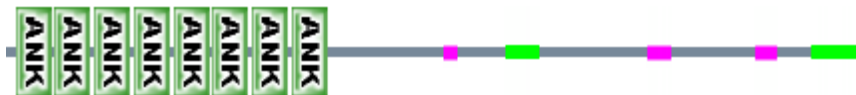

**C**

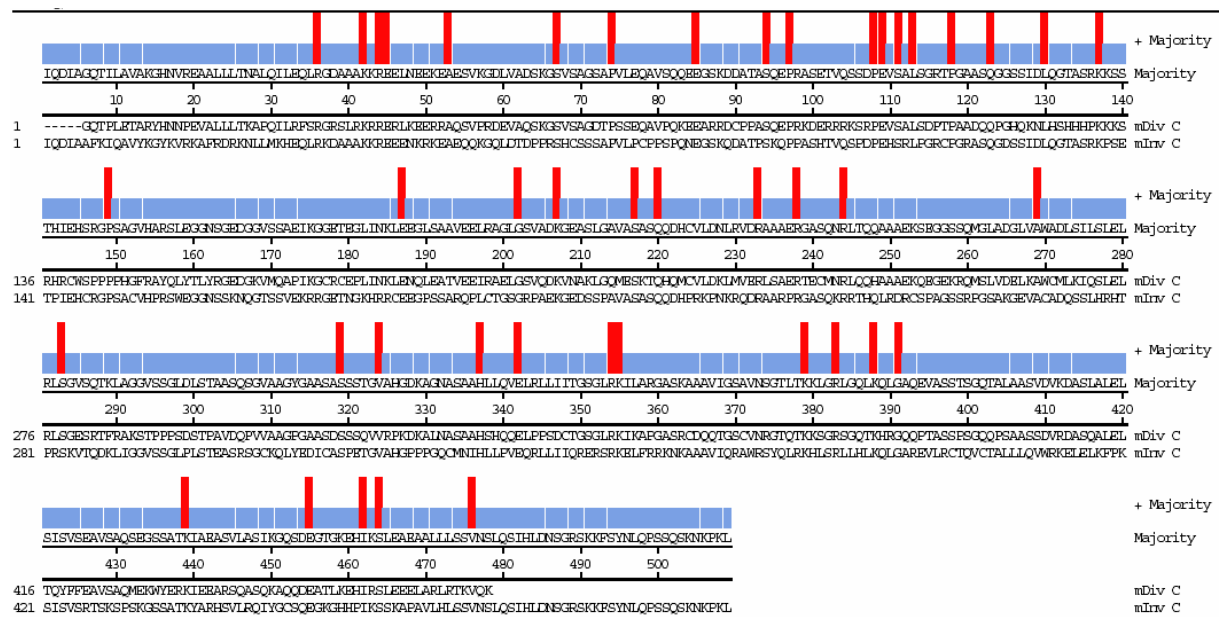

**D**

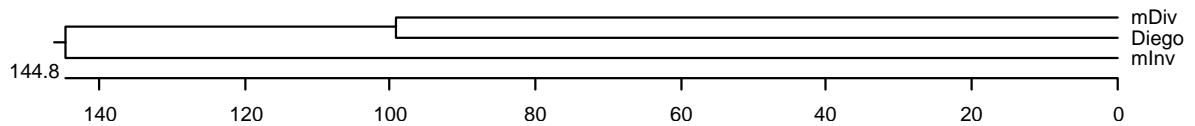

**Supplementary Figure 4:** Comparison between mouse inversin and diversin.

**(a)** Domain composition of mouse inversin (SMART). Inversin contains 15 ankyrin repeats in the N-terminal half. The C-terminal half contains two calmodulin-binding sites (IQ, aa 554-576, 913-935) and two segments of low complexity (pink, aa 589-607, 973-989). **(b)** Domain composition of mouse diversin (SMART). Diversin contains 8 ankyrin repeats in the N-terminal half. The C-terminal half contains three segments of low complexity (pink, aa 365-377, 536-556, 625-643) and two coiled-coil regions (green, aa 417-445, 672-712). **(c)** Alignment of the C-terminal domains of mouse inversin (mINV C) and mouse diversin (mDIV C) reveals a modest degree of conserved amino acids (7.4% identity). **(d)** Phylogenetic analysis between Diego, mouse diversin (mDiv), and mouse inversin (mInv) demonstrates that diversin is more closely related to the *Drosophila* PCP protein Diego (19.1% identity) than to inversin (16.2% identity).
