# Supplementary material
Source: PubMed Central journal article supplement (PMC3733333)
Supplement: NIHMS416831-supplement-suuplement-fig_5.pdf [file NIHMS416831-supplement-suuplement-fig_5.pdf]

## Supplementary Figure 5

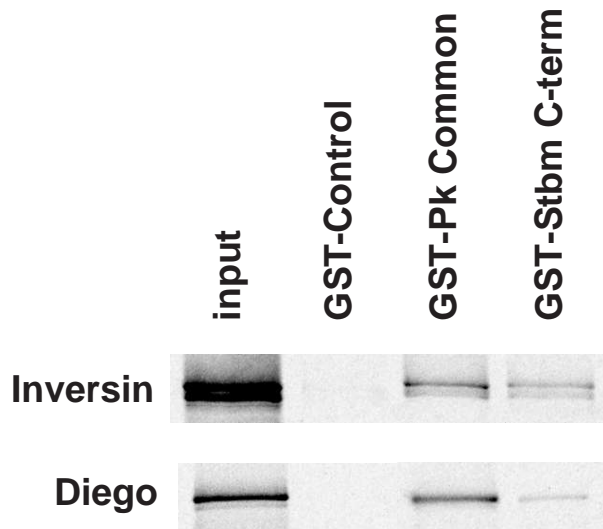

**Supplementary Figure 5:** Inversin shows the same binding behavior as Diego with respect to Prickle (Pk) and Strabismus (Stbm). GST fusion proteins with a fragment of Pk present in all Pk isoforms (GST-Pk Common), with the C-terminus of Stbm (GST-Stbm C-term) and with the N-terminal region of the PkM isoform (GST-Control) were tested for their ability to pull down the in vitro translated and  $^{35}\text{S}$ -labelled full-length versions of inversin and diego. The two proteins interact in a similar pattern to Pk Common and the C-terminal part of Strabismus. As standard, 10% of the in vitro translated protein used for the pull down was loaded directly (input).
