# Supplementary material
Source: PubMed Central journal article supplement (PMC3733333)
Supplement: NIHMS416831-supplement-suuplement-table1.pdf [file NIHMS416831-supplement-suuplement-table1.pdf]

## Supplementary Table 1: Primer sequences

### Cloning primer for inversin truncations 1-553 and 554-1062:

INV not\*1062

5' - cgc ggg gcg gcc gcc cta AAG CTT TGG CTT GTT TTT TGA TTG – 3'

INV Not \*553

5' - cgc ggg gcg gcc gcc cta AGC TGC GAT GGA CAG GGC AC - 3'

INV Mlu 554

5' - cgc ggg acg cgt ATA CAA GAC ATC GCT GCC TTC - 3'

INV Mlu 1

5' - cgc ggg acg cgt ATG AAC ATA TCC GAG GAT GTA CTC TCT ACG GGG TCC TCA  
TTA GCA TCT CAG - 3'

### Cloning primer for inversin L493S:

sense primer:

5' - caa gac aaa gag gga cga aca gct tcg cac tgg tcc tgt aac aat ggc tac – 3'

antisense primer:

5' – gta gcc att gtt aca gga cca gtg cga agc tgt tcg tcc ctc ttt gtc ttg – 3'

### Cloning primer for myr/palm-mDvl-1:

forward primer including clamp site (aatt), EcoR1 site, Myr/palm attachment site from lck (Hajduch et al, Diabetes, 1998):

5' - aatt gaa ttc gcc acc ATG GGC TGC GTG TGC TCC TCC AAC CCC GAG GAC GAC ctg  
gcg gag acc aaa atc atc tac -3'

reverse primer 20 bp upstream of Pst I site (896 bp):

5' – gtc att gct cat gtt ctc -3'

### Primer for RT-PCR in zebrafish:

inv-2170F: AAG ATT CAG TGG CGG CAA AAG GA

inv-2984R: AGC AGA CTC CAC CCC TTT CAA CG

inv-2233F: GCA GGA GAG AGA AAC CAA GCA GAG C

inv-2979R: ACT CCA CCC CTT TCA ACG ACC TG

beta-actin: CAT CAG CAT GGC TTC TGC TCT GTA TGG

beta-actin: GAC TTG TCA GTG TAC AGA GAC ACC CTG

diversin 455F: GTC ACT CCC AGA GCA CTC GCA TC

diversin 1221R: TGG TGC CTG CAT CACTTT TCC AT

diversin 363F: CCA GTC AGC CAA GCT GCT CGT TA

diversin 990R: CTC CTG GGA AGC TGG TGG ACA AT

**Primer for RT-PCR in *Xenopus*:**

**Inversin:**

forward: 5'-GTG CAA AGG TGC ACC TTG TAG AC-3'

backward: 5'-GAG GCT GCA ATG TCC TGA ATG GC-3'

**ODC:**

forward: 5'-AAT GGA TTT CAG AGA CCA-3'

backward: 5'-CCA AGG CTA AAG TTG CAG-3'

**Chordin:**

forward: 5'-GCT CCA GAC TAT GAC AGG A-3'

backward: 5'-GCA CAG TTG GAT GCC AAC GC-3'
